# Supplementary material for: The Potential of GMP-Compliant Platelet Lysate to Induce a Permissive State for Cardiovascular Transdifferentiation in Human Mediastinal Adipose Tissue-Derived Mesenchymal Stem Cells
Source: Hindawi journal article supplement (doi:10.1155/2015/162439), 2015-01-01
Supplement: f1 [file 162439.f1.pdf]

DAPI/II Ab

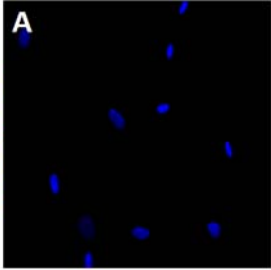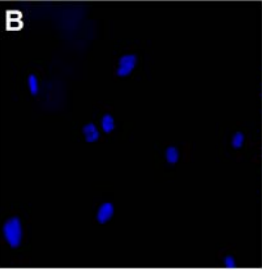

DAPI/II Ab
